# Supplementary material for: Goals and task difficulty expectations modulate striatal responses to feedback
Source: PubMed Central journal article supplement (PMC4072914; doi:10.3758/s13415-014-0269-8), 2014-03-18
Supplement: 13415_2014_269_MOESM1_ESM.pdf [file 13415_2014_269_MOESM1_ESM.pdf]

## Supplemental Methods: Whole-brain Analyses:

We performed a whole-brain ANOVA to identify main effects of labeled difficulty (“EASY” or “HARD”), actual difficulty (low or high), and feedback valence. To explore the direction of the main effects, whole-brain contrasts were used to detect differences in brain responses to positive and negative feedback under different task difficulty expectations (positive versus negative when labeled “EASY,” positive versus negative when labeled “HARD”). We additionally conducted a whole-brain Analysis of Covariance (ANCOVA) to explore relationships between normative goals and the effect of expectations on the pattern of feedback activation.

Clusters of voxels identified by the feedback-onset GLM analysis at an uncorrected statistical threshold of  $p < 0.001$  were subjected to the cluster-level statistical threshold estimator in BrainVoyager, which provided a contiguity threshold for each contrast to produce a cluster level false positive alpha rate of 0.05.

## Supplemental Results

Supplemental Table 1. Brain regions showing a main effect of feedback valence ( $p < 0.05$ , cluster threshold corrected).

| Region of Activation                                                                     | BA | Size (# voxels) | Peak Talairach Coordinates (x, y, z) |     |     | Maximum F Value |
|------------------------------------------------------------------------------------------|----|-----------------|--------------------------------------|-----|-----|-----------------|
| Positive feedback > Negative Feedback                                                    |    |                 |                                      |     |     |                 |
| Cerebellum, posterior lobe, declive ( R )                                                |    | 31022           | 38                                   | -65 | -18 | 45.29           |
| Middle Frontal Gyrus ( R )                                                               | 46 | 742             | 53                                   | 40  | 18  | 28.92           |
| Striatum ( R )                                                                           |    |                 |                                      |     |     |                 |
| Putamen (ventral, anterior) ( R )                                                        |    | 13528           | 20                                   | 7   | -6  | 93.18           |
| *Putamen (dorsal)( R )                                                                   |    |                 | 26                                   | -5  | 12  | 42.64           |
| *Globus Pallidus( R )                                                                    |    |                 | 26                                   | -17 | 3   | 44.39           |
| Superior Parietal Lobule (BA 7)( R )                                                     | 7  | 349             | 26                                   | -68 | 42  | 20.40           |
| Precuneus (BA 7)( R )                                                                    | 7  | 351             | 20                                   | -56 | 51  | 21.23           |
| Paracentral Lobule (BA 5)( R )                                                           | 5  | 1995            | 5                                    | -38 | 54  | 62.64           |
| Posterior Temporal & Occipital Cortex ( L )                                              |    |                 |                                      |     |     |                 |
| Occipital lobe, fusiform gyrus (BA 19) ( L )                                             | 19 | 33659           | -43                                  | -71 | -12 | 52.36           |
| *Occipital lobe, lingual gyrus ( L )                                                     | 19 |                 | -31                                  | -71 | 6   | 43.61           |
| *Temporal lobe, fusiform gyrus                                                           | 37 |                 | -46                                  | -38 | -15 | 33.66           |
| Striatum ( L )                                                                           |    |                 |                                      |     |     |                 |
| Putamen (ventral, posterior) ( L )                                                       |    | 14176           | -28                                  | -11 | -6  | 61.32           |
| **Caudate Body ( L )                                                                     |    |                 | -21                                  | 4   | 21  | 27.23           |
| White matter (parietal/frontal lobe sub-gyral) ( L )                                     |    | 354             | -28                                  | -29 | 30  | 26.34           |
| Negative Feedback > Positive Feedback                                                    |    |                 |                                      |     |     |                 |
| No regions exhibited greater feedback activation for negative than for positive feedback |    |                 |                                      |     |     |                 |

BA, Brodmann Area.

\*To better identify the separate brain areas encompassed within the larger clusters, the threshold was increased until the larger clusters separated into smaller ones and those peaks are also reported.

| Region of Activation                                                          | BA | Size (# voxels) | Peak Talairach Coordinates (x, y, z) |     |     | Maximum <i>F</i> Value |
|-------------------------------------------------------------------------------|----|-----------------|--------------------------------------|-----|-----|------------------------|
| High Difficulty > Low Difficulty                                              |    |                 |                                      |     |     |                        |
| Middle Frontal Gyrus ( R )                                                    | 8  | 148             | 44                                   | 19  | 42  | 20.24                  |
| Insula ( R )                                                                  |    | 113             | 35                                   | 10  | 6   | 23.04                  |
| Cerebellum, anterior lobe, culmen ( R )                                       |    | 154             | 20                                   | -23 | -27 | 26.11                  |
| Thalamus ( R )                                                                |    | 161             | 5                                    | -20 | 18  | 37.29                  |
| Inferior Frontal Gyrus ( L )                                                  | 11 | 66              | -10                                  | 37  | -18 | 30.72                  |
| Low Difficulty > High Difficulty                                              |    |                 |                                      |     |     |                        |
| No regions exhibited greater feedback activation during low difficulty blocks |    |                 |                                      |     |     |                        |
| BA, Brodmann area.                                                            |    |                 |                                      |     |     |                        |

Supplemental Table 3. Brain regions showing a main effect of labeled difficulty ( $p < 0.05$ , cluster threshold corrected).

| Region of Activation                                                          | BA | Size (# voxels) | Peak Talairach Coordinates (x, y, z) |    |     | Maximum <i>F</i> Value |
|-------------------------------------------------------------------------------|----|-----------------|--------------------------------------|----|-----|------------------------|
| “HARD” > “EASY”                                                               |    |                 |                                      |    |     |                        |
| Inferior Frontal Gyrus ( R )                                                  | 47 | 164             | -34                                  | 25 | -15 | 22.024                 |
| “EASY” > “HARD”                                                               |    |                 |                                      |    |     |                        |
| No regions exhibited greater feedback activation during “EASY”-labeled blocks |    |                 |                                      |    |     |                        |
| BA, Brodmann area.                                                            |    |                 |                                      |    |     |                        |

Supplemental Table 4. Brain regions showing an interaction between feedback valence and difficulty label ( $p < 0.05$ , cluster threshold corrected).

| Region of Activation           | BA | Size (# voxels) | Peak Talairach Coordinates (x, y, z) |     |    | Maximum <i>F</i> Value |
|--------------------------------|----|-----------------|--------------------------------------|-----|----|------------------------|
| Middle Temporal Gyrus ( R )    | 21 | 612             | 56                                   | -20 | -3 | 34.04                  |
| Inferior Temporal Gyrus ( R )  | 20 | 59              | 53                                   | -47 | -9 | 23.89                  |
| Precuneus ( L )                | 31 | 85              | -7                                   | -62 | 23 | 21.55                  |
| Superior Parietal Lobule ( L ) | 7  | 98              | -28                                  | -47 | 57 | 23.17                  |
| Insula ( L )                   | 13 | 145             | -37                                  | -23 | 5  | 32.39                  |
| BA, Brodmann Area.             |    |                 |                                      |     |    |                        |

| Region of Activation             | BA | Size (# voxels) | Peak Talairach Coordinates (x, y, z) |     |     | Maximum <i>F</i> Value |
|----------------------------------|----|-----------------|--------------------------------------|-----|-----|------------------------|
| High difficulty > Low difficulty |    |                 |                                      |     |     |                        |
| Superior Frontal Gyrus           | 9  | 219             | 29                                   | 55  | 31  | 5.601711               |
| Putamen                          |    | 129             | 20                                   | 16  | -3  | 4.558174               |
| Lingual Gyrus                    | 18 | 211             | 11                                   | -68 | 3   | 4.764969               |
| Thalamus                         |    | 185             | 5                                    | -20 | 18  | 6.096312               |
| Anterior Cerebellum (Culmen)     |    | 1166            | -22                                  | -41 | -15 | 6.724807               |
| Insula                           | 13 | 415             | -37                                  | 13  | 15  | 4.805342               |

BA, Brodmann Area.

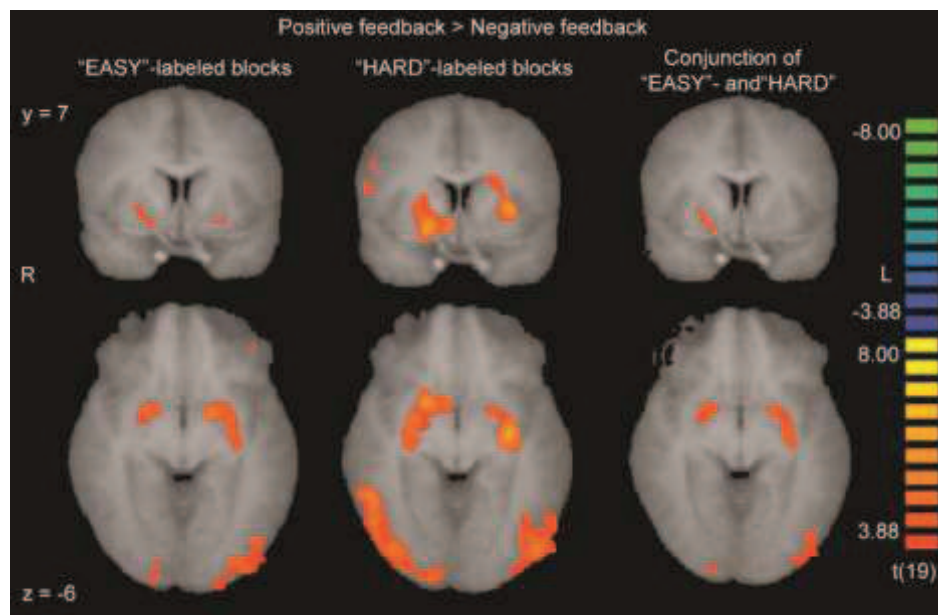

Supplemental Figure 1. Valence sensitivity in “EASY”- and “HARD”-labeled blocks. Positive > Negative feedback contrast activated the striatum in both “EASY”-labeled blocks (shown at left,  $p < 0.05$ , cluster threshold corrected; max  $t = 7.07$ ) and “HARD”-labeled blocks (shown at center,  $p < 0.05$ , cluster threshold corrected; max  $t = 6.80$ ), including the ventral striatum, putamen, and the body of the caudate nucleus. Posterior cortical regions including the fusiform and middle occipital gyri were also sensitive to feedback valence, as well as smaller regions in DLPFC, precuneus, and the paracentral lobule. Conjunction of “EASY” and “HARD” blocks is shown at right ( $p < 0.05$ , cluster threshold corrected).

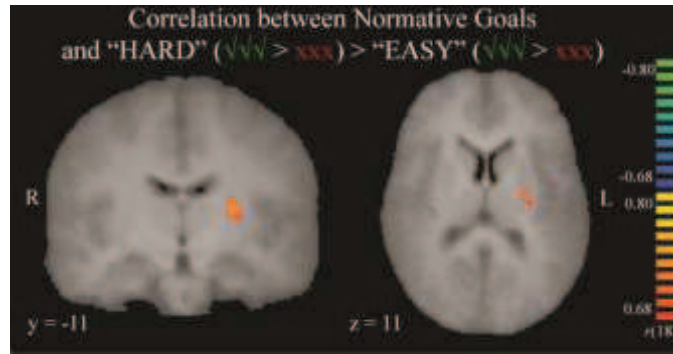

Supplemental Figure 2. Correlation between normative goals and expectation by valence interaction. In the dorsal putamen, normative goals were significantly positively correlated with the difference in "HARD" positive > negative feedback processing versus "EASY" positive > negative feedback processing (peak  $r(18) = .75$ ,  $p < 0.05$  corrected).
